# Supplementary material
Source: publisher site journal article supplement (https://www.spandidos-publications.com/5120/downloadSupplementary)
Supplement: Supplementary file 1 [file downloadSupplementary]

## Sheet: Sheet1
Table SXXIII. The staining composite score for each tissue section.
Serial number	A	B	C	D	E	F	G	H	I	J	K	L	M	N	O	P
1	1	2	1	1	6	2	6	4	9	12	12	12	12	6	9	×
2	6	6	6	12	6	12	12	12	9	6	6	4	4	6	6	6
3	3	2	1	3	1	2	2	3	3	6	2	×	3	2	6	6
4	2	2	×	1	3	4	×	6	1	3	6	6	2	6	3	6
5	1	1	1	2	2	1	1	×	4	3	3	6	1	6	1	6
6	1	1	1	1	0	1	0	1	2	2	6	6	2	6	6	6
7	2	2	1	2	1	1	1	1	0	1	2	1	0	1	6	3
8	1	2	1	2	2	1	4	2	1	6	3	2	2	4	4	6
9	0	1	1	2	0	2	1	1	1	2	2	2	2	12	4	6
10	0	1	1	1	3	4
Scoring accuracy was adversely affected in 1-K, 5-A, 8-I and 9-N. x means tissue was lost in staining.
